# Supplementary material
Source: MDPI journal article supplement (https://www.mdpi.com/2072-4292/14/23/6183)
Supplement: s1 [file s1]

# Etna Output Rate during the Last Decade (2011–2022): Insights for Hazard Assessment

## Supplementary Material

This Supplementary Material comprises Table S1 and Table S2, whereas the Reference list of the citations listed in both Tables is in the main text.

**Table S1.** Paroxysmal explosive episodes of lava fountaining (LF) occurring at Etna volcano between 1 January 2011 and July 2022. The table consists of two halves that show the same features: the half on the left shows the quantities manually detected, while the one on the right those determined by using the software tool.

| N | Starting Time           | Ending Time             | Duration (min) | LF Max Height (m) | LF Mean Height (m) | LF Volume of Pyro $V_2$ ( $10^6\text{m}^3$ ) | TADR ( $\text{m}^3\text{s}^{-1}$ ) | Starting Time           | Ending Time             | Duration (min) | LF max Height (m) | LF Mean Height (m) | LF Volume of Pyro $V_2$ ( $10^6\text{m}^3$ ) | TADR ( $\text{m}^3\text{s}^{-1}$ ) |
|---|-------------------------|-------------------------|----------------|-------------------|--------------------|----------------------------------------------|------------------------------------|-------------------------|-------------------------|----------------|-------------------|--------------------|----------------------------------------------|------------------------------------|
| 1 | 12-Jan-2011<br>21:15:00 | 12-Jan-2011<br>23:51:00 | 156            | 791               | 313                | 3.80                                         | 405                                | 12-Jan-2011<br>22:15:55 | 12-Jan-2011<br>23:51:00 | 96             | 794.14            | 341.82             | 0.53                                         | 92.89                              |
| 2 | 18-Feb-2011<br>12:36:00 | 18-Feb-2011<br>13:05:00 | 29             | 171               | 92                 | 0.095                                        | 55                                 | 18-Feb-2011<br>12:36:00 | 18-Feb-2011<br>13:04:36 | 29             | 141.22            | 86.88              | 0.09                                         | 51.44                              |
| 3 | 10-Apr-2011<br>09:00:00 | 10-Apr-2011<br>13:14:00 | 254            | 1080              | 308                | 1.40                                         | 94                                 | 10-Apr-2011<br>09:24:53 | 10-Apr-2011<br>13:06:05 | 222            | 805.34            | 337.54             | 1.37                                         | 102.94                             |
| 4 | 12-May-2011<br>00:20:00 | 12-May-2011<br>03:30:00 | 190            | 880               | 331                | 1.10                                         | 97                                 | 12-May-2011<br>00:24:46 | 12-May-2011<br>03:30:00 | 186            | 1163.27           | 316.24             | 1.10                                         | 99.06                              |
| 5 | 09-Jul-2011<br>13:47:00 | 09-Jul-2011<br>15:20:00 | 93             | 1131              | 520                | 0.68                                         | 122                                | 09-Jul-2011<br>13:51:33 | 09-Jul-2011<br>15:20:00 | 89             | 1159.69           | 489.25             | 0.64                                         | 121.38                             |
| 6 | 19-Jul-2011<br>00:00:00 | 19-Jul-2011<br>02:10:00 | 130            | 1040              | 487                | 0.94                                         | 121                                | 19-Jul-2011<br>00:03:21 | 19-Jul-2011<br>02:09:42 | 127            | 829.45            | 484.93             | 0.93                                         | 122.84                             |
| 7 | 25-Jul-2011             | 25-Jul-2011             | 246            | 823               | 289                | 1.30                                         | 89                                 | 25-Jul-2011             | 25-Jul-2011             | 258            | 964.79            | 478.30             | 1.11                                         | 71.61                              |

|    |                             |                             |     |      |     |      |     |                             |                             |     |         |        |      |        |
|----|-----------------------------|-----------------------------|-----|------|-----|------|-----|-----------------------------|-----------------------------|-----|---------|--------|------|--------|
|    | 01:44:00                    | 05:50:00                    |     |      |     |      |     | 03:06:07                    | 07:23:54                    |     |         |        |      |        |
| 8  | 30-Jul-<br>2011<br>19:16:00 | 30-Jul-<br>2011<br>21:20:00 | 124 | 1000 | 374 | 0.78 | 105 | 30-Jul-<br>2011<br>19:16:00 | 30-Jul-<br>2011<br>21:16:20 | 121 | 957.14  | 364.02 | 0.72 | 99.78  |
| 9  | 05-Aug-<br>2011<br>21:26:00 | 05-Aug-<br>2011<br>23:20:00 | 114 | 1086 | 685 | 0.98 | 143 | 05-Aug-<br>2011<br>21:30:30 | 05-Aug-<br>2011<br>23:19:14 | 109 | 1074.46 | 632.46 | 0.90 | 138.53 |
| 10 | 12-Aug-<br>2011<br>08:00:00 | 12-Aug-<br>2011<br>10:18:00 | 138 | 1017 | 362 | 0.82 | 98  | 12-Aug-<br>2011<br>08:00:00 | 12-Aug-<br>2011<br>10:14:08 | 135 | 844.15  | 363.73 | 0.75 | 93.15  |
| 11 | 20-Aug-<br>2011<br>06:58:00 | 20-Aug-<br>2011<br>07:50:00 | 52  | 994  | 411 | 0.34 | 110 | 20-Aug-<br>2011<br>07:00:48 | 20-Aug-<br>2011<br>07:50:00 | 50  | 1031.59 | 422.87 | 0.34 | 114.48 |
| 12 | 29-Aug-<br>2011<br>03:55:00 | 29-Aug-<br>2011<br>05:05:00 | 70  | 1080 | 453 | 0.48 | 113 | 29-Aug-<br>2011<br>03:55:00 | 29-Aug-<br>2011<br>04:55:13 | 61  | 925.14  | 541.93 | 0.47 | 129.58 |
| 13 | 08-Sep-<br>2011<br>06:50:00 | 08-Sep-<br>2011<br>08:22:00 | 92  | 983  | 371 | 0.55 | 100 | 08-Sep-<br>2011<br>06:52:17 | 08-Sep-<br>2011<br>08:22:00 | 90  | 999.49  | 401.13 | 0.60 | 110.73 |
| 14 | 19-Sep-<br>2011<br>12:40:00 | 19-Sep-<br>2011<br>13:45:00 | 65  | 651  | 509 | 0.50 | 129 | 19-Sep-<br>2011<br>12:32:41 | 19-Sep-<br>2011<br>13:43:00 | 71  | 613.57  | 430.43 | 0.05 | 12.99  |
| 15 | 28-Sep-<br>2011<br>19:05:00 | 28-Sep-<br>2011<br>19:59:00 | 54  | 1029 | 271 | 0.27 | 83  | 28-Sep-<br>2011<br>19:05:00 | 28-Sep-<br>2011<br>19:57:41 | 53  | 720.25  | 50.79  | 0.18 | 56.94  |
| 16 | 23-Oct-<br>2011<br>18:30:00 | 23-Oct-<br>2011<br>20:16:00 | 106 | 550  | 238 | 0.52 | 82  | 23-Oct-<br>2011<br>18:32:06 | 23-Oct-<br>2011<br>20:16:00 | 104 | 703.69  | 396.76 | 0.68 | 108.63 |
| 17 | 15-Nov-<br>2011<br>11:15:00 | 15-Nov-<br>2011<br>12:28:00 | 73  | 960  | 590 | 0.59 | 136 | 15-Nov-<br>2011<br>11:15:00 | 15-Nov-<br>2011<br>12:27:33 | 73  | 746.07  | 488.33 | 0.54 | 123.29 |
| 18 | 05-Jan-<br>2012<br>05:30:00 | 05-Jan-<br>2012<br>06:44:00 | 74  | 1200 | 644 | 0.63 | 142 | 05-Jan-<br>2012<br>05:31:26 | 05-Jan-<br>2012<br>06:44:00 | 73  | 1549.96 | 997.19 | 0.79 | 180.64 |
| 19 | 08-Feb-<br>2012             | 09-Feb-<br>2012             | 351 | 750  | 326 | 2.10 | 100 | 08-Feb-<br>2012             | 09-Feb-<br>2012             | 345 | 578.09  | 407.05 | 2.33 | 112.97 |

|    |                             |                             |     |      |     |      |     |                             |                             |     |         |        |      |        |
|----|-----------------------------|-----------------------------|-----|------|-----|------|-----|-----------------------------|-----------------------------|-----|---------|--------|------|--------|
|    | 2012<br>23:48:00            | 2012<br>05:39:00            |     |      |     |      |     | 2012<br>23:54:46            | 2012<br>05:39:00            |     |         |        |      |        |
| 20 | 04-Mar-<br>2012<br>06:00:00 | 04-Mar-<br>2012<br>09:31:00 | 211 | 1400 | 444 | 1.30 | 105 | 04-Mar-<br>2012<br>06:50:18 | 04-Mar-<br>2012<br>09:31:00 | 161 | 1200.19 | 641.52 | 1.34 | 138.79 |
| 21 | 18-Mar-<br>2012<br>07:30:00 | 18-Mar-<br>2012<br>10:14:00 | 164 | 1700 | 669 | 1.40 | 146 | 18-Mar-<br>2012<br>07:30:00 | 18-Mar-<br>2012<br>10:10:04 | 161 | 1006.41 | 582.32 | 1.30 | 135.46 |
| 22 | 01-Apr-<br>2012<br>01:52:00 | 01-Apr-<br>2012<br>03:39:00 | 107 | 1500 | 682 | 0.90 | 140 | 01-Apr-<br>2012<br>01:53:20 | 01-Apr-<br>2012<br>03:36:18 | 103 | 959.85  | 646.66 | 0.87 | 140.63 |
| 23 | 12-Apr-<br>2012<br>13:19:00 | 12-Apr-<br>2012<br>15:20:00 | 121 | 1950 | 649 | 0.93 | 128 | 12-Apr-<br>2012<br>13:42:32 | 12-Apr-<br>2012<br>15:20:00 | 98  | 1314.36 | 793.00 | 0.94 | 160.02 |
| 24 | 23-Apr-<br>2012<br>01:12:00 | 23-Apr-<br>2012<br>02:23:00 | 71  | 1400 | 688 | 0.64 | 151 | 24-Apr-<br>2012<br>01:13:10 | 24-Apr-<br>2012<br>02:20:00 | 67  | 1033.49 | 669.10 | 0.59 | 145.91 |
| 25 | 19-Feb-<br>2013<br>03:48:00 | 19-Feb-<br>2013<br>05:02:00 | 74  | 983  | 634 | 0.61 | 138 | 19-Feb-<br>2013<br>03:48:00 | 19-Feb-<br>2013<br>05:00:41 | 73  | 964.09  | 609.92 | 0.60 | 137.52 |
| 26 | 20-Feb-<br>2013<br>00:30:00 | 20-Feb-<br>2013<br>01:41:00 | 71  | 1057 | 515 | 0.53 | 124 | 20-Feb-<br>2013<br>00:33:48 | 20-Feb-<br>2013<br>01:41:00 | 68  | 932.74  | 515.16 | 0.52 | 128.01 |
| 27 | 20-Feb-<br>2013<br>12:40:00 | 20-Feb-<br>2013<br>13:46:00 | 66  | 743  | 186 | 0.28 | 72  | 20-Feb-<br>2013<br>12:40:00 | 20-Feb-<br>2013<br>13:43:15 | 64  | 701.38  | 263.85 | 0.16 | 40.92  |
| 28 | 23-Feb-<br>2013<br>18:20:00 | 23-Feb-<br>2013<br>19:14:00 | 54  | 1350 | 634 | 0.41 | 128 | 23-Feb-<br>2013<br>18:25:14 | 23-Feb-<br>2013<br>19:14:00 | 49  | 1062.34 | 670.94 | 0.43 | 147.52 |
| 29 | 28-Feb-<br>2013<br>10:00:00 | 28-Feb-<br>2013<br>10:46:00 | 46  | 891  | 534 | 0.35 | 128 | 28-Feb-<br>2013<br>10:02:32 | 28-Feb-<br>2013<br>10:46:00 | 44  | 852.86  | 561.23 | 0.35 | 134.60 |
| 30 | 05-Mar-<br>2013<br>23:18:00 | 06-Mar-<br>2013<br>00:15:00 | 57  | 938  | 607 | 0.46 | 133 | 05-Mar-<br>2013<br>23:18:00 | 06-Mar-<br>2013<br>00:10:31 | 53  | 979.08  | 554.22 | 0.41 | 128.84 |

|    |                             |                             |     |      |      |      |     |                             |                             |     |         |         |      |        |
|----|-----------------------------|-----------------------------|-----|------|------|------|-----|-----------------------------|-----------------------------|-----|---------|---------|------|--------|
| 31 | 16-Mar-<br>2013<br>17:20:00 | 16-Mar-<br>2013<br>18:15:00 | 55  | 926  | 612  | 0.44 | 135 | 16-Mar-<br>2013<br>17:20:00 | 16-Mar-<br>2013<br>18:14:26 | 55  | 1076.34 | 651.47  | 0.46 | 140.10 |
| 32 | 03-Apr-<br>2013<br>11:20:00 | 03-Apr-<br>2013<br>14:42:00 | 202 | 971  | 202  | 1.49 | 123 | 03-Apr-<br>2013<br>11:28:18 | 03-Apr-<br>2013<br>14:40:15 | 192 | 757.96  | 405.04  | 1.30 | 113.26 |
| 33 | 11-Apr-<br>2013<br>23:00:00 | 12-Apr-<br>2013<br>12:05:00 | 785 | 971  | 202  | 3.60 | 77  | 12-Apr-<br>2013<br>00:06:26 | 12-Apr-<br>2013<br>12:05:00 | 719 | 946.78  | 416.27  | 4.94 | 114.57 |
| 34 | 18-Apr-<br>2013<br>10:52:00 | 18-Apr-<br>2013<br>13:09:00 | 137 | 1320 | 471  | 0.92 | 112 | 18-Apr-<br>2013<br>10:52:00 | 18-Apr-<br>2013<br>13:09:00 | 137 | 747.88  | 431.67  | 0.65 | 79.42  |
| 35 | 20-Apr-<br>2013<br>15:19:00 | 20-Apr-<br>2013<br>16:32:00 | 73  | 900  | 312  | 1.00 | 96  | 20-Apr-<br>2013<br>15:15:00 | 20-Apr-<br>2013<br>16:29:50 | 75  | 614.96  | 346.90  | 0.43 | 96.02  |
| 36 | 27-Apr-<br>2013<br>16:36:00 | 27-Apr-<br>2013<br>19:36:00 | 180 | 900  | 312  | 1.03 | 96  | 27-Apr-<br>2013<br>16:36:00 | 27-Apr-<br>2013<br>19:36:00 | 180 | 596.39  | 343.84  | 1.11 | 102.87 |
| 37 | 26-Oct-<br>2013<br>02:55:00 | 26-Oct-<br>2013<br>10:21:00 | 446 | 983  | 588  | 3.62 | 136 | 26-Oct-<br>2013<br>02:55:00 | 26-Oct-<br>2013<br>10:10:58 | 436 | 907.48  | 681.69  | 3.83 | 146.37 |
| 38 | 16-Nov-<br>2013<br>22:41:00 | 17-Nov-<br>2013<br>04:40:00 | 359 | 1200 | 416  | 0.24 | 112 | 16-Nov-<br>2013<br>22:51:30 | 17-Nov-<br>2013<br>04:40:00 | 349 | 829.20  | 462.66  | 2.48 | 118.79 |
| 39 | 23-Nov-<br>2013<br>09:00:00 | 23-Nov-<br>2013<br>10:17:00 | 77  | 3400 | 1075 | 0.79 | 171 | 23-Nov-<br>2013<br>09:00:00 | 23-Nov-<br>2013<br>10:50:20 | 111 | 2430.58 | 1020.37 | 0.96 | 145.43 |
| 40 | 28-Nov-<br>2013<br>20:15:00 | 28-Nov-<br>2013<br>22:39:00 | 144 | 800  | 386  | 0.95 | 109 | 28-Nov-<br>2013<br>20:15:00 | 28-Nov-<br>2013<br>20:41:54 | 27  | 787.41  | 550.31  | 0.21 | 132.19 |
| 41 | 03-Dec-<br>2015<br>01:50:00 | 03-Dec-<br>2015<br>03:27:00 | 97  | 3850 | 1423 | 3.60 | 620 | 03-Dec-<br>2015<br>01:53:28 | 03-Dec-<br>2015<br>03:25:00 | 92  | 1891.75 | 713.67  | 0.80 | 145.65 |
| 42 | 04-Dec-<br>2015             | 04-Dec-<br>2015             | 113 | 2600 | 1080 | 3.40 | 532 | 04-Dec-<br>2015             | 04-Dec-<br>2015             | 74  | 1834.50 | 1063.16 | 0.81 | 184.35 |

|    |                         |                         |     |      |      |        |     |                         |                         |     |         |        |      |        |
|----|-------------------------|-------------------------|-----|------|------|--------|-----|-------------------------|-------------------------|-----|---------|--------|------|--------|
|    | 08:41:00                | 10:34:00                |     |      |      |        |     | 08:51:42                | 10:05:00                |     |         |        |      |        |
| 43 | 04-Dec-2015<br>20:04:00 | 04-Dec-2015<br>21:20:00 | 76  | 1800 | 558  | 2.00   | 438 | 04-Dec-2015<br>20:04:00 | 04-Dec-2015<br>20:43:00 | 39  | 1484.95 | 671.59 | 0.17 | 72.33  |
| 44 | 05-Dec-2015<br>14:00:00 | 05-Dec-2015<br>16:35:00 | 155 | 880  | 350  | 2.80   | 300 | 05-Dec-2015<br>14:00:00 | 05-Dec-2015<br>16:28:52 | 149 | 897.66  | 430.18 | 1.01 | 112.82 |
| 45 | 18-May-2016<br>09:00:00 | 18-May-2016<br>11:50:00 | 170 | 125  | 33   | 0.26   | 25  | 18-May-2016<br>09:05:44 | 18-May-2016<br>11:00:00 | 115 | 361.00  | 78.79  | 0.34 | 49.56  |
| 46 | 18-May-2016<br>10:55:00 | 18-May-2016<br>13:59:00 | 184 | 550  | 336  | 3.10   | 281 | 18-May-2016<br>11:00:00 | 18-May-2016<br>13:43:18 | 164 | 900.91  | 329.70 | 0.96 | 97.56  |
| 47 | 24-Aug-2018<br>07:20:00 | 24-Aug-2018<br>09:00:00 | 100 | 74   | 74   | 0.29   | 49  | 24-Aug-2018<br>07:20:00 | 24-Aug-2018<br>08:57:59 | 98  | 141.80  | 43.56  | 0.09 | 15.96  |
| 48 | 24-Dec-2018<br>11:11:00 | 24-Dec-2018<br>11:48:00 | 37  | 950  | 413  | 0.25   | 112 | 24-Dec-2018<br>11:11:00 | 24-Dec-2018<br>11:47:10 | 37  | 380.03  | 252.14 | 0.20 | 91.07  |
| 49 | 24-Dec-2018<br>11:00:00 | 24-Dec-2018<br>12:49:00 | 109 | 800  | 422  | 0.0084 | 114 | 24-Dec-2018<br>11:19:30 | 24-Dec-2018<br>12:49:00 | 90  | 902.66  | 361.21 | 0.53 | 98.44  |
| 50 | 19-Apr-2020<br>08:46:00 | 19-Apr-2020<br>09:46:00 | 60  | 333  | 115  | 0.19   | 53  | 19-Apr-2020<br>08:46:00 | 19-Apr-2020<br>10:32:40 | 107 | 195.00  | 107.69 | 0.09 | 14.73  |
| 51 | 13-Dec-2020<br>22:00:00 | 13-Dec-2020<br>22:48:00 | 48  | 571  | 231  | 0.24   | 84  | 13-Dec-2020<br>22:04:38 | 13-Dec-2020<br>22:16:00 | 12  | 280.02  | 245.64 | 0.06 | 93.20  |
| 52 | 13-Dec-2020<br>23:58:00 | 14-Dec-2020<br>00:11:00 | 13  | 400  | 235  | 0.07   | 90  | 13-Dec-2020<br>23:58:00 | 14-Dec-2020<br>00:08:48 | 11  | 471.45  | 431.85 | 0.07 | 108.39 |
| 53 | 14-Dec-2020<br>01:02:00 | 14-Dec-2020<br>01:40:00 | 38  | 286  | 121  | 0.13   | 58  | 14-Dec-2020<br>01:02:00 | 14-Dec-2020<br>01:39:46 | 38  | 115.20  | 90.18  | 0.12 | 52.29  |
| 54 | 21-Dec-                 | 21-Dec-                 | 48  | 3080 | 1296 | 0.58   | 200 | 21-Dec-                 | 21-Dec-                 | 27  | 1389.87 | 901.40 | 0.13 | 81.75  |

|    | 2020<br>09:11:00            | 2020<br>09:59:00            |     |      |      |      |     | 2020<br>09:11:00            | 2020<br>09:37:40            |     |         |         |      |        |
|----|-----------------------------|-----------------------------|-----|------|------|------|-----|-----------------------------|-----------------------------|-----|---------|---------|------|--------|
| 55 | 22-Dec-<br>2020<br>03:05:00 | 22-Dec-<br>2020<br>05:13:00 | 128 | 800  | 295  | 0.72 | 93  | 22-Dec-<br>2020<br>03:05:00 | 22-Dec-<br>2020<br>06:04:08 | 180 | 516.31  | 352.11  | 0.84 | 77.72  |
| 56 | 18-Jan-<br>2021<br>19:38:00 | 18-Jan-<br>2021<br>21:03:00 | 85  | 1067 | 343  | 0.52 | 101 | 18-Jan-<br>2021<br>19:39:22 | 18-Jan-<br>2021<br>21:02:00 | 83  | 900.51  | 753.47  | 0.37 | 74.79  |
| 57 | 16-Feb-<br>2021<br>16:11:00 | 16-Feb-<br>2021<br>17:02:00 | 51  | 1560 | 757  | 0.46 | 150 | 16-Feb-<br>2021<br>16:11:00 | 16-Feb-<br>2021<br>17:00:14 | 50  | 1330.33 | 720.79  | 0.44 | 149.09 |
| 58 | 17-Feb-<br>2021<br>22:32:00 | 18-Feb-<br>2021<br>00:51:00 | 139 | 1230 | 358  | 0.82 | 98  | 17-Feb-<br>2021<br>22:37:31 | 18-Feb-<br>2021<br>00:51:00 | 134 | 1105.29 | 534.97  | 1.04 | 129.41 |
| 59 | 19-Feb-<br>2021<br>08:16:00 | 19-Feb-<br>2021<br>10:06:00 | 110 | 1365 | 492  | 0.78 | 118 | 19-Feb-<br>2021<br>08:16:00 | 19-Feb-<br>2021<br>10:04:15 | 109 | 1095.88 | 546.31  | 0.84 | 130.01 |
| 60 | 20-Feb-<br>2021<br>21:32:00 | 21-Feb-<br>2021<br>01:15:00 | 223 | 1500 | 386  | 1.40 | 107 | 20-Feb-<br>2021<br>21:32:01 | 21-Feb-<br>2021<br>01:09:05 | 218 | 738.46  | 337.88  | 1.33 | 102.29 |
| 61 | 22-Feb-<br>2021<br>21:17:00 | 23-Feb-<br>2021<br>00:03:00 | 166 | 3667 | 686  | 1.20 | 120 | 22-Feb-<br>2021<br>21:17:00 | 23-Feb-<br>2021<br>00:02:50 | 166 | 1726.77 | 846.33  | 1.43 | 143.58 |
| 62 | 23-Feb-<br>2021<br>03:52:00 | 23-Feb-<br>2021<br>04:50:00 | 58  | 900  | 337  | 0.32 | 92  | 23-Feb-<br>2021<br>03:52:00 | 23-Feb-<br>2021<br>04:28:54 | 37  | 780.64  | 640.13  | 0.29 | 131.28 |
| 63 | 24-Feb-<br>2021<br>18:56:00 | 24-Feb-<br>2021<br>21:41:00 | 165 | 1800 | 649  | 1.40 | 139 | 24-Feb-<br>2021<br>18:59:32 | 24-Feb-<br>2021<br>21:44:46 | 166 | 1383.67 | 845.36  | 1.61 | 161.92 |
| 64 | 28-Feb-<br>2021<br>07:31:00 | 28-Feb-<br>2021<br>08:34:00 | 63  | 3600 | 1376 | 0.70 | 185 | 28-Feb-<br>2021<br>07:31:00 | 28-Feb-<br>2021<br>08:42:40 | 72  | 2502.00 | 1106.89 | 0.75 | 175.57 |
| 65 | 02-Mar-<br>2021<br>11:23:00 | 02-Mar-<br>2021<br>14:50:00 | 207 | 606  | 278  | 1.00 | 83  | 02-Mar-<br>2021<br>11:29:01 | 02-Mar-<br>2021<br>12:11:00 | 42  | 333.38  | 269.69  | 0.15 | 59.43  |

|    |                         |                         |     |      |      |      |     |                         |                         |     |         |         |      |        |
|----|-------------------------|-------------------------|-----|------|------|------|-----|-------------------------|-------------------------|-----|---------|---------|------|--------|
| 66 | 04-Mar-2021<br>01:30:00 | 04-Mar-2021<br>04:10:00 | 160 | 600  | 204  | 0.75 | 78  | 04-Mar-2021<br>01:30:28 | 04-Mar-2021<br>01:43:00 | 13  | 324.74  | 308.96  | 0.05 | 63.20  |
| 67 | 04-Mar-2021<br>07:11:00 | 04-Mar-2021<br>09:32:00 | 141 | 3233 | 1275 | 1.60 | 186 | 04-Mar-2021<br>07:16:58 | 04-Mar-2021<br>09:32:00 | 136 | 1449.58 | 868.23  | 1.34 | 165.15 |
| 68 | 07-Mar-2021<br>04:10:00 | 07-Mar-2021<br>07:01:00 | 171 | 4000 | 638  | 1.10 | 104 | 07-Mar-2021<br>04:11:03 | 07-Mar-2021<br>04:58:00 | 47  | 551.71  | 473.35  | 0.35 | 125.15 |
| 69 | 09-Mar-2021<br>23:55:00 | 10-Mar-2021<br>02:46:00 | 171 | 1860 | 655  | 1.40 | 140 | 10-Mar-2021<br>01:11:52 | 10-Mar-2021<br>02:03:00 | 52  | 764.52  | 690.41  | 0.03 | 8.68   |
| 70 | 12-Mar-2021<br>07:35:00 | 12-Mar-2021<br>09:45:00 | 130 | 2400 | 1149 | 1.60 | 209 | 12-Mar-2021<br>07:30:00 | 12-Mar-2021<br>09:56:34 | 147 | 1579.21 | 1059.18 | 1.61 | 182.58 |
| 71 | 14-Mar-2021<br>23:12:00 | 15-Mar-2021<br>01:42:00 | 150 | 1333 | 670  | 0.53 | 59  | 14-Mar-2021<br>23:21:04 | 15-Mar-2021<br>01:43:00 | 142 | 1120.83 | 462.95  | 0.66 | 77.55  |
| 72 | 17-Mar-2021<br>01:30:00 | 17-Mar-2021<br>04:57:00 | 207 | 1533 | 538  | 1.60 | 127 | 17-Mar-2021<br>01:37:42 | 17-Mar-2021<br>03:00:00 | 83  | 502.29  | 278.40  | 0.42 | 84.18  |
| 73 | 19-Mar-2021<br>08:18:00 | 19-Mar-2021<br>10:13:00 | 115 | 629  | 171  | 0.75 | 108 | 19-Mar-2021<br>08:22:56 | 19-Mar-2021<br>09:40:00 | 78  | 679.22  | 475.47  | 0.58 | 124.48 |
| 74 | 23-Mar-2021<br>21:33:00 | 24-Mar-2021<br>08:19:00 | 646 | 1333 | 456  | 4.60 | 118 | 23-Mar-2021<br>21:33:01 | 24-Mar-2021<br>01:16:00 | 223 | 390.28  | 363.31  | 0.28 | 20.71  |
| 75 | 31-Mar-2021<br>19:30:00 | 01-Apr-2021<br>08:53:00 | 803 | 630  | 241  | 4.10 | 85  | 31-Mar-2021<br>19:30:00 | 01-Apr-2021<br>08:14:39 | 765 | 588.16  | 232.15  | 3.70 | 80.65  |
| 76 | 19-May-2021<br>00:50:00 | 19-May-2021<br>04:25:00 | 215 | 667  | 482  | 1.60 | 124 | 19-May-2021<br>00:53:56 | 19-May-2021<br>04:25:00 | 212 | 469.10  | 384.85  | 1.41 | 111.48 |
| 77 | 21-May-2021             | 21-May-2021             | 114 | 1533 | 683  | 0.99 | 145 | 21-May-2021             | 21-May-2021             | 113 | 748.02  | 631.74  | 0.97 | 143.62 |

|    |                         |                         |     |      |     |      |     |                         |                         |     |         |         |      |        |
|----|-------------------------|-------------------------|-----|------|-----|------|-----|-------------------------|-------------------------|-----|---------|---------|------|--------|
|    | 00:50:00                | 02:44:00                |     |      |     |      |     | 00:51:41                | 02:44:01                |     |         |         |      |        |
| 78 | 22-May-2021<br>20:27:00 | 22-May-2021<br>22:08:00 | 101 | 1200 | 649 | 0.86 | 143 | 22-May-2021<br>20:27:00 | 22-May-2021<br>22:06:36 | 100 | 899.09  | 790.46  | 0.95 | 159.03 |
| 79 | 24-May-2021<br>20:25:00 | 24-May-2021<br>21:49:00 | 84  | 1467 | 831 | 0.82 | 162 | 24-May-2021<br>20:25:00 | 24-May-2021<br>21:47:42 | 83  | 1264.74 | 1056.08 | 0.91 | 183.62 |
| 80 | 25-May-2021<br>18:20:00 | 25-May-2021<br>18:53:00 | 33  | 533  | 317 | 0.20 | 102 | 25-May-2021<br>18:20:44 | 25-May-2021<br>18:53:00 | 33  | 348.87  | 322.51  | 0.21 | 106.62 |
| 81 | 26-May-2021<br>10:20:00 | 26-May-2021<br>11:10:00 | 50  | 1267 | 627 | 0.41 | 136 | 26-May-2021<br>10:20:58 | 26-May-2021<br>11:10:00 | 50  | 660.43  | 522.56  | 0.39 | 133.57 |
| 82 | 27-May-2021<br>12:50:00 | 27-May-2021<br>12:59:00 | 9   | 1133 | 691 | 0.36 | 149 | 27-May-2021<br>12:51:00 | 27-May-2021<br>13:04:44 | 14  | 838.81  | 803.34  | 0.13 | 162.82 |
| 83 | 28-May-2021<br>06:30:00 | 28-May-2021<br>07:27:00 | 57  | 800  | 433 | 0.40 | 116 | 28-May-2021<br>06:30:50 | 28-May-2021<br>07:27:00 | 57  | 495.58  | 407.78  | 0.40 | 117.40 |
| 84 | 28-May-2021<br>16:05:00 | 28-May-2021<br>16:11:00 | 6   | 333  | 295 | 0.04 | 112 | 28-May-2021<br>16:05:20 | 28-May-2021<br>16:11:00 | 6   | 376.12  | 355.42  | 0.04 | 131.15 |
| 85 | 28-May-2021<br>19:48:00 | 28-May-2021<br>20:50:00 | 62  | 1000 | 601 | 0.51 | 138 | 28-May-2021<br>19:49:08 | 28-May-2021<br>20:50:00 | 61  | 589.16  | 475.87  | 0.46 | 124.92 |
| 86 | 30-May-2021<br>04:20:00 | 30-May-2021<br>05:44:00 | 84  | 1000 | 589 | 0.69 | 137 | 30-May-2021<br>04:21:20 | 30-May-2021<br>05:44:00 | 83  | 576.08  | 507.34  | 0.64 | 128.94 |
| 87 | 02-Jun-2021<br>08:30:00 | 02-Jun-2021<br>10:46:00 | 136 | 1640 | 924 | 1.40 | 170 | 02-Jun-2021<br>08:30:00 | 02-Jun-2021<br>10:41:18 | 132 | 1672.44 | 939.01  | 1.09 | 138.94 |
| 88 | 04-Jun-2021<br>16:12:00 | 04-Jun-2021<br>17:40:00 | 88  | 1170 | 665 | 0.76 | 143 | 04-Jun-2021<br>16:30:00 | 04-Jun-2021<br>17:35:40 | 66  | 1095.23 | 741.21  | 0.61 | 153.60 |
| 89 | 12-Jun-2021             | 12-Jun-2021             | 106 | 810  | 438 | 0.73 | 115 | 12-Jun-2021             | 12-Jun-2021             | 104 | 581.71  | 417.74  | 0.72 | 116.16 |



|     |                             |                             |    |      |      |      |     |                             |                             |    |         |         |      |        |
|-----|-----------------------------|-----------------------------|----|------|------|------|-----|-----------------------------|-----------------------------|----|---------|---------|------|--------|
|     | 2021<br>20:00:00            | 2021<br>21:46:00            |    |      |      |      |     | 2021<br>20:02:35            | 2021<br>21:46:00            |    |         |         |      |        |
| 90  | 14-Jun-<br>2021<br>21:15:00 | 14-Jun-<br>2021<br>22:21:00 | 66 | 870  | 419  | 0.44 | 112 | 14-Jun-<br>2021<br>21:16:38 | 14-Jun-<br>2021<br>22:21:00 | 65 | 726.22  | 445.17  | 0.47 | 120.64 |
| 91  | 16-Jun-<br>2021<br>11:37:00 | 16-Jun-<br>2021<br>12:38:00 | 61 | 1733 | 673  | 0.52 | 142 | 16-Jun-<br>2021<br>11:37:00 | 16-Jun-<br>2021<br>12:12:06 | 36 | 1337.60 | 1202.12 | 0.33 | 155.82 |
| 92  | 17-Jun-<br>2021<br>22:40:00 | 17-Jun-<br>2021<br>23:55:00 | 75 | 1140 | 404  | 0.50 | 111 | 17-Jun-<br>2021<br>22:41:22 | 17-Jun-<br>2021<br>23:55:00 | 74 | 665.02  | 379.79  | 0.49 | 111.36 |
| 93  | 19-Jun-<br>2021<br>18:47:00 | 19-Jun-<br>2021<br>19:35:00 | 48 | 1140 | 572  | 0.38 | 131 | 19-Jun-<br>2021<br>18:48:04 | 19-Jun-<br>2021<br>19:35:00 | 47 | 726.54  | 558.94  | 0.38 | 135.60 |
| 94  | 20-Jun-<br>2021<br>22:40:00 | 20-Jun-<br>2021<br>23:44:00 | 64 | 2467 | 892  | 0.63 | 164 | 20-Jun-<br>2021<br>22:40:56 | 20-Jun-<br>2021<br>23:44:00 | 64 | 1265.39 | 1069.38 | 0.72 | 189.83 |
| 95  | 22-Jun-<br>2021<br>02:30:00 | 22-Jun-<br>2021<br>03:45:00 | 75 | 2000 | 848  | 0.71 | 158 | 22-Jun-<br>2021<br>02:30:00 | 22-Jun-<br>2021<br>03:43:02 | 74 | 955.13  | 741.07  | 0.68 | 155.12 |
| 96  | 23-Jun-<br>2021<br>02:44:00 | 23-Jun-<br>2021<br>03:19:00 | 35 | 1867 | 1035 | 0.38 | 183 | 23-Jun-<br>2021<br>02:44:00 | 23-Jun-<br>2021<br>03:18:16 | 35 | 992.64  | 669.97  | 0.30 | 148.21 |
| 97  | 23-Jun-<br>2021<br>18:00:00 | 23-Jun-<br>2021<br>19:12:00 | 72 | 2933 | 1301 | 0.60 | 140 | 23-Jun-<br>2021<br>18:01:40 | 23-Jun-<br>2021<br>19:12:00 | 71 | 1411.63 | 660.58  | 0.57 | 134.18 |
| 98  | 24-Jun-<br>2021<br>09:45:00 | 24-Jun-<br>2021<br>10:26:00 | 41 | 1733 | 825  | 0.39 | 157 | 24-Jun-<br>2021<br>09:21:30 | 24-Jun-<br>2021<br>10:30:00 | 69 | 1528.27 | 1014.24 | 0.55 | 132.65 |
| 99  | 25-Jun-<br>2021<br>00:38:00 | 25-Jun-<br>2021<br>01:48:00 | 70 | 2333 | 876  | 0.64 | 153 | 25-Jun-<br>2021<br>01:04:18 | 25-Jun-<br>2021<br>01:48:00 | 44 | 1265.17 | 767.69  | 0.42 | 158.68 |
| 100 | 25-Jun-<br>2021<br>18:40:00 | 25-Jun-<br>2021<br>19:20:00 | 40 | 1133 | 691  | 0.36 | 149 | 25-Jun-<br>2021<br>01:05:00 | 25-Jun-<br>2021<br>01:48:18 | 44 | 1065.17 | 570.71  | 0.35 | 132.97 |

|     |                             |                             |     |      |      |      |     |                             |                             |     |         |         |      |        |
|-----|-----------------------------|-----------------------------|-----|------|------|------|-----|-----------------------------|-----------------------------|-----|---------|---------|------|--------|
| 101 | 26-Jun-<br>2021<br>16:00:00 | 26-Jun-<br>2021<br>16:38:00 | 38  | 1600 | 772  | 0.35 | 155 | 26-Jun-<br>2021<br>16:00:52 | 26-Jun-<br>2021<br>16:38:00 | 38  | 1249.66 | 902.10  | 0.39 | 176.86 |
| 102 | 27-Jun-<br>2021<br>08:53:00 | 27-Jun-<br>2021<br>09:43:00 | 50  | 1600 | 674  | 0.43 | 143 | 27-Jun-<br>2021<br>08:50:00 | 27-Jun-<br>2021<br>10:02:04 | 73  | 704.45  | 370.83  | 0.47 | 107.88 |
| 103 | 28-Jun-<br>2021<br>14:25:00 | 28-Jun-<br>2021<br>15:30:00 | 65  | 2390 | 1211 | 0.75 | 193 | 28-Jun-<br>2021<br>14:26:24 | 28-Jun-<br>2021<br>15:30:00 | 64  | 2135.90 | 1240.59 | 0.71 | 185.22 |
| 104 | 01-Jul-<br>2021<br>22:50:00 | 02-Jul-<br>2021<br>00:27:00 | 97  | 1800 | 804  | 0.91 | 156 | 01-Jul-<br>2021<br>22:50:00 | 01-Jul-<br>2021<br>23:59:00 | 69  | 1338.67 | 1032.32 | 0.76 | 183.36 |
| 105 | 04-Jul-<br>2021<br>15:15:00 | 04-Jul-<br>2021<br>16:50:00 | 95  | 1467 | 873  | 0.94 | 164 | 04-Jul-<br>2021<br>15:30:00 | 04-Jul-<br>2021<br>16:48:48 | 79  | 1227.57 | 972.57  | 0.83 | 175.93 |
| 106 | 06-Jul-<br>2021<br>22:16:00 | 06-Jul-<br>2021<br>23:44:00 | 88  | 3270 | 1673 | 1.20 | 227 | 06-Jul-<br>2021<br>22:18:00 | 06-Jul-<br>2021<br>23:44:00 | 86  | 2809.36 | 1498.24 | 1.12 | 216.22 |
| 107 | 08-Jul-<br>2021<br>20:35:00 | 08-Jul-<br>2021<br>22:12:00 | 97  | 2710 | 1242 | 1.10 | 192 | 08-Jul-<br>2021<br>20:37:10 | 08-Jul-<br>2021<br>22:12:00 | 95  | 1858.01 | 1217.19 | 1.07 | 187.30 |
| 108 | 14-Jul-<br>2021<br>10:45:00 | 14-Jul-<br>2021<br>12:30:00 | 105 | 2230 | 1097 | 1.20 | 183 | 14-Jul-<br>2021<br>10:47:58 | 14-Jul-<br>2021<br>12:30:00 | 103 | 2177.18 | 1313.19 | 1.23 | 200.13 |
| 109 | 20-Jul-<br>2021<br>05:10:00 | 20-Jul-<br>2021<br>08:11:00 | 181 | 3510 | 1533 | 2.30 | 208 | 20-Jul-<br>2021<br>05:41:56 | 20-Jul-<br>2021<br>08:11:00 | 150 | 2271.40 | 1342.41 | 1.73 | 193.53 |
| 110 | 31-Jul-<br>2021<br>19:44:00 | 31-Jul-<br>2021<br>23:37:00 | 233 | 3830 | 1473 | 2.80 | 202 | 31-Jul-<br>2021<br>19:54:42 | 31-Jul-<br>2021<br>23:37:00 | 223 | 2205.36 | 1166.07 | 2.45 | 183.43 |
| 111 | 09-Aug-<br>2021<br>02:07:00 | 09-Aug-<br>2021<br>04:11:00 | 124 | 2390 | 1280 | 1.50 | 199 | 09-Aug-<br>2021<br>02:07:00 | 09-Aug-<br>2021<br>04:09:02 | 123 | 1808.31 | 1181.17 | 1.39 | 189.60 |
| 112 | 29-Aug-<br>2021             | 29-Aug-<br>2021             | 91  | 2390 | 1310 | 1.10 | 202 | 29-Aug-<br>2021             | 29-Aug-<br>2021             | 89  | 2459.76 | 1438.71 | 1.09 | 204.82 |

|     |             |             |     |      |      |      |     |             |             |     |         |         |      |        |
|-----|-------------|-------------|-----|------|------|------|-----|-------------|-------------|-----|---------|---------|------|--------|
|     | 16:24:00    | 17:55:00    |     |      |      |      |     | 16:24:00    | 17:52:34    |     |         |         |      |        |
| 113 | 21-Sep-2021 | 21-Sep-2021 | 74  | 2333 | 1234 | 0.88 | 199 | 21-Sep-2021 | 21-Sep-2021 | 73  | 1639.74 | 1417.61 | 0.90 | 206.73 |
|     | 07:21:00    | 08:35:00    |     |      |      |      |     | 07:21:00    | 08:33:50    |     |         |         |      |        |
| 114 | 23-Oct-2021 | 23-Oct-2021 | 117 | 4000 | 1844 | 1.60 | 232 | 23-Oct-2021 | 23-Oct-2021 | 116 | 2414.34 | 1819.92 | 1.66 | 239.58 |
|     | 08:20:00    | 10:17:00    |     |      |      |      |     | 08:21:50    | 10:17:00    |     |         |         |      |        |
| 115 | 10-Feb-2022 | 10-Feb-2022 | 196 | 5714 | 2160 | 2.90 | 245 | 10-Feb-2022 | 10-Feb-2022 | 176 | 5060.35 | 1621.89 | 2.28 | 216.26 |
|     | 18:40:00    | 21:56:00    |     |      |      |      |     | 19:00:10    | 21:56:00    |     |         |         |      |        |
| 116 | 21-Feb-2022 | 21-Feb-2022 | 99  | 4057 | 1865 | 1.40 | 234 | 21-Feb-2022 | 21-Feb-2022 | 98  | 2231.38 | 1628.58 | 1.33 | 228.14 |
|     | 11:11:00    | 12:50:00    |     |      |      |      |     | 11:11:00    | 12:48:16    |     |         |         |      |        |

**Table S2.** Eruptive activity occurring at Etna volcano between 13 January 2011 and 10 October 2022, with the erupted volumes obtained by available references. Fountain volume refers to pyroclastic material erupted during each single episode, whereas cumulative fountain volume refers to the cumulated volumes of pyroclastic material erupted over time. Similarly, lava volume refers to the lava flow volume erupted during each single episode, whereas the cumulative lava volume is the cumulated volume of lava flows erupted over time. Fountain + lava volume refers to the volume of pyroclastic material and lava flows erupted during each episode, and the cumulative total volume refers to the cumulated volume of pyroclastic material and lava flow erupted over time. The episode numbers in the first column refer to the lava fountain episodes. No numbers correspond to a just effusive (lava flow) episode.

| Episode # | Starting Date | Ending Date | Fountain Volume | Cumulative Fountain Volume | Lava Volume    | Cumulative Lava Volume | Fountain + Lava Volume | Cumulative Total Volume | Reference Fountain Volume | Reference Lava Volume | Notes                            |
|-----------|---------------|-------------|-----------------|----------------------------|----------------|------------------------|------------------------|-------------------------|---------------------------|-----------------------|----------------------------------|
|           |               |             |                 |                            |                |                        |                        |                         |                           |                       | (in yellow the estimated values) |
|           | dd/mm/yy      | dd/mm/yy    | m <sup>3</sup>  | m <sup>3</sup>             | m <sup>3</sup> | m <sup>3</sup>         | m <sup>3</sup>         | m <sup>3</sup>          |                           |                       |                                  |
| 1         | 13/01/11      | 13/01/11    | 850,000         | 850,000                    | 1,550,000      | 1,550,000              | 2,400,000              | 2,400,000               | [22]                      | [37]                  |                                  |
| 2         | 18/02/11      | 18/02/11    | 850,000         | 1,700,000                  | 1,000,000      | 2,550,000              | 1,850,000              | 4,250,000               | estimated                 | estimated             |                                  |
| 3         | 10/04/11      | 10/04/11    | 1,434,400       | 3,134,400                  | 877,000        | 3,427,000              | 2,311,400              | 6,561,400               | [22]                      | [37]                  |                                  |
| 4         | 12/05/11      | 12/05/11    | 1,107,380       | 4,241,780                  | 1,470,000      | 4,897,000              | 2,577,380              | 9,138,780               | [22]                      | [37]                  |                                  |
| 5         | 09/07/11      | 09/07/11    | 678,370         | 4,920,150                  | 1,490,000      | 6,387,000              | 2,168,370              | 11,307,150              | [22]                      | [37]                  |                                  |
| 6         | 19/07/11      | 19/07/11    | 941,360         | 5,861,510                  | 2,140,000      | 8,527,000              | 3,081,360              | 14,388,510              | [22]                      | [37]                  |                                  |
| 7         | 25/07/11      | 25/07/11    | 1,311,680       | 7,173,190                  | 988,000        | 9,515,000              | 2,299,680              | 16,688,190              | [22]                      | [37]                  |                                  |

|                   |          |          |           |            |           |            |           |            |                                                                                             |           |                            |
|-------------------|----------|----------|-----------|------------|-----------|------------|-----------|------------|---------------------------------------------------------------------------------------------|-----------|----------------------------|
| 8                 | 30/07/11 | 30/07/11 | 777,510   | 7,950,700  | 2,220,000 | 11,735,000 | 2,997,510 | 19,685,700 | [22]                                                                                        | [37]      |                            |
| 9                 | 05/08/11 | 05/08/11 | 975,970   | 8,926,670  | 1,590,000 | 13,325,000 | 2,565,970 | 22,251,670 | [22]                                                                                        | [37]      |                            |
| 10                | 12/08/11 | 12/08/11 | 815,420   | 9,742,090  | 2,860,000 | 16,185,000 | 3,675,420 | 25,927,090 | [22]                                                                                        | [37]      |                            |
| 11                | 20/08/11 | 20/08/11 | 342,280   | 10,084,370 | 1,400,000 | 17,585,000 | 1,742,280 | 27,669,370 | [22]                                                                                        | [37]      |                            |
| 12                | 29/08/11 | 29/08/11 | 476,290   | 10,560,660 | 1,740,000 | 19,325,000 | 2,216,290 | 29,885,660 | [22]                                                                                        | [37]      |                            |
| 13                | 08/09/11 | 08/09/11 | 553,960   | 11,114,620 | 1,220,000 | 20,545,000 | 1,773,960 | 31,659,620 | [22]                                                                                        | [37]      |                            |
| 14                | 19/09/11 | 19/09/11 | 501,500   | 11,616,120 | 1,000,000 | 21,545,000 | 1,501,500 | 33,161,120 | [22]                                                                                        | estimated |                            |
| 15                | 28/09/11 | 28/09/11 | 269,570   | 11,885,690 | 1,000,000 | 22,545,000 | 1,269,570 | 34,430,690 | [22]                                                                                        | estimated |                            |
| 16                | 08/10/11 | 08/10/11 | 875,000   | 12,760,690 | 1,000,000 | 23,545,000 | 1,875,000 | 36,305,690 | estimated                                                                                   | estimated |                            |
| 17                | 23/10/11 | 23/10/11 | 524,300   | 13,284,990 | 1,310,000 | 24,855,000 | 1,834,300 | 38,139,990 | [22]                                                                                        | [37]      |                            |
| 18                | 15/11/11 | 15/11/11 | 594,480   | 13,879,470 | 1,810,000 | 26,665,000 | 2,404,480 | 40,544,470 | [22]                                                                                        | [37]      |                            |
| 19                | 05/01/12 | 05/01/12 | 818,420   | 14,697,890 | 1,490,000 | 28,155,000 | 2,308,420 | 42,852,890 | [22]                                                                                        | [37]      |                            |
| 20                | 09/02/12 | 09/02/12 | 2,105,970 | 16,803,860 | 871,000   | 29,026,000 | 2,976,970 | 45,829,860 | [22]                                                                                        | [37]      |                            |
| 21                | 04/03/12 | 04/03/12 | 1,335,420 | 18,139,280 | 2,550,000 | 31,576,000 | 3,885,420 | 49,715,280 | [22]                                                                                        | [37]      |                            |
| 22                | 18/03/12 | 18/03/12 | 1,439,050 | 19,578,330 | 2,150,000 | 33,726,000 | 3,589,050 | 53,304,330 | [22]                                                                                        | [37]      |                            |
| 23                | 01/04/12 | 01/04/12 | 901,100   | 20,479,430 | 1,640,000 | 35,366,000 | 2,541,100 | 55,845,430 | [22]                                                                                        | [37]      |                            |
| 24                | 12/04/12 | 12/04/12 | 929,030   | 21,408,460 | 1,710,000 | 37,076,000 | 2,639,030 | 58,484,460 | [22]                                                                                        | [37]      |                            |
| 25                | 24/04/12 | 24/04/12 | 641,280   | 22,049,740 | 2,620,000 | 39,696,000 | 3,261,280 | 61,745,740 | [22]                                                                                        | [37]      |                            |
| 03/07/12 02/12/12 |          |          |           | 22,049,740 | 3,110,400 | 42,806,400 | 3,110,400 | 64,856,140 | Lava flow within BN, Volume estimated from 0,2 m³/s obtained by [24] extended for 6 months, |           |                            |
| 26                | 19/02/13 | 19/02/13 | 611,340   | 22,661,080 | 2,580,000 | 45,386,400 | 3,191,340 | 68,047,480 | [22]                                                                                        | [37]      |                            |
| 27                | 20/02/13 | 20/02/13 | 826,000   | 23,487,080 | 2,360,000 | 47,746,400 | 3,186,000 | 71,233,480 | [22]                                                                                        | [37]      | Cumulative of two episodes |
| 29                | 21/02/13 | 21/02/13 | 830,000   | 24,317,080 | 1,000,000 | 48,746,400 | 1,830,000 | 73,063,480 | estimated                                                                                   | estimated |                            |

|    |          |          |           |            |           |            |           |             |           |           |                                   |
|----|----------|----------|-----------|------------|-----------|------------|-----------|-------------|-----------|-----------|-----------------------------------|
| 30 | 23/02/13 | 23/02/13 | 426,830   | 24,743,910 | 1,000,000 | 49,746,400 | 1,426,830 | 74,490,310  | [22]      | estimated |                                   |
| 31 | 28/02/13 | 28/02/13 | 351,930   | 25,095,840 | 1,170,000 | 50,916,400 | 1,521,930 | 76,012,240  | [22]      | [37]      |                                   |
| 32 | 06/03/13 | 06/03/13 | 456,050   | 25,551,890 | 1,000,000 | 51,916,400 | 1,456,050 | 77,468,290  | [22]      | estimated |                                   |
| 33 | 16/03/13 | 16/03/13 | 444,410   | 25,996,300 | 1,470,000 | 53,386,400 | 1,914,410 | 79,382,700  | [22]      | [37]      |                                   |
| 34 | 03/04/13 | 03/04/13 | 1,512,880 | 27,509,180 | 2,600,000 | 55,986,400 | 4,112,880 | 83,495,580  | [22]      | [37]      |                                   |
| 35 | 12/04/13 | 12/04/13 | 1,466,621 | 28,975,801 | 1,390,000 | 57,376,400 | 2,856,621 | 86,352,201  | [22]      | [37]      |                                   |
| 36 | 18/04/13 | 18/04/13 | 922,730   | 29,898,531 | 1,510,000 | 58,886,400 | 2,432,730 | 88,784,931  | [22]      | [37]      |                                   |
| 37 | 20/04/13 | 20/04/13 | 480,500   | 30,379,031 | 1,180,000 | 60,066,400 | 1,660,500 | 90,445,431  | [22]      | [37]      |                                   |
| 38 | 27/04/13 | 27/04/13 | 1,038,250 | 31,417,281 | 2,000,000 | 62,066,400 | 3,038,250 | 93,483,681  | [22]      | [37]      |                                   |
| 39 | 26/10/13 | 26/10/13 | 3,628,450 | 35,045,731 | 1,220,000 | 63,286,400 | 4,848,450 | 98,332,131  | [22]      | [37]      |                                   |
| 40 | 11/11/13 | 11/11/13 | 830,000   | 35,875,731 | 1,110,000 | 64,396,400 | 1,940,000 | 100,272,131 | estimated | [37,38]   |                                   |
| 41 | 16/11/13 | 17/11/13 | 2,409,520 | 38,285,251 | 1,210,000 | 65,606,400 | 3,619,520 | 103,891,651 | [22]      | [37]      |                                   |
| 42 | 23/11/13 | 23/11/13 | 789,240   | 39,074,491 | 662,000   | 66,268,400 | 1,451,240 | 105,342,891 | [22]      | [37]      |                                   |
| 43 | 28/11/13 | 28/11/13 | 944,860   | 40,019,351 | 494,000   | 66,762,400 | 1,438,860 | 106,781,751 | [22]      | [37]      |                                   |
| 44 | 02/12/13 | 02/12/13 | 830,000   | 40,849,351 | 900,000   | 67,662,400 | 1,730,000 | 108,511,751 | estimated | [39]      |                                   |
| 45 | 14/12/13 | 16/12/13 |           | 40,849,351 | 908,000   | 68,570,400 | 908,000   | 109,419,751 |           | [37,38]   | Only lava flows                   |
|    | 29/12/13 | 31/12/13 |           | 40,849,351 | 1,150,000 | 69,720,400 | 1,150,000 | 110,569,751 |           | [37,38]   | Only lava flows                   |
| 47 | 22/01/14 | 07/04/14 |           | 40,849,351 | 9,300,000 | 79,020,400 | 9,300,000 | 119,869,751 |           | [37]      | Only lava flows                   |
| 49 | 14/06/14 | 18/06/14 |           | 40,849,351 | 1,290,000 | 80,310,400 | 1,290,000 | 121,159,751 |           | [37,40]   | Only lava flows                   |
| 50 | 07/07/14 | 20/08/14 |           | 40,849,351 | 6,570,000 | 86,880,400 | 6,570,000 | 127,729,751 |           | [37]      | Only lava flows                   |
| 51 | 28/12/14 | 28/12/14 | 830,000   | 41,679,351 | 2,600,000 | 89,480,400 | 3,430,000 | 131,159,751 | Estimated | [39]      |                                   |
| 52 | 31/01/15 | 02/02/15 |           | 41,679,351 | 1,350,000 | 90,830,400 | 1,350,000 | 132,509,751 |           | [37]      | Only lava flows                   |
| 53 | 11/05/15 | 16/05/15 |           | 41,679,351 | 1,370,000 | 92,200,400 | 1,370,000 | 133,879,751 |           | [37]      | Only lava flows                   |
| 54 | 03/12/15 | 03/12/15 | 4,190,000 | 45,869,351 |           | 92,200,400 | 4,190,000 | 138,069,751 | [41]      |           | No lava flows, Only lava fountain |

|    |          |          |           |            |           |             |           |             |                               |                                                                        |
|----|----------|----------|-----------|------------|-----------|-------------|-----------|-------------|-------------------------------|------------------------------------------------------------------------|
| 55 | 04/12/15 | 04/12/15 | 4,570,000 | 50,439,351 |           | 92,200,400  | 4,570,000 | 142,639,751 | [41]                          | No lava flows, Only lava fountain                                      |
| 56 | 05/12/15 | 05/12/15 | 1,360,000 | 51,799,351 |           | 92,200,400  | 1,360,000 | 143,999,751 | [41]                          | No lava flows, Only lava fountain                                      |
| 57 | 06/12/15 | 08/12/15 |           | 51,799,351 | 2,730,000 | 94,930,400  | 2,730,000 | 146,729,751 | [42]                          | Lava flows+scoria cone                                                 |
| 58 | 18/05/16 | 19/05/16 |           | 51,799,351 | 400,000   | 95,330,400  | 400,000   | 147,129,751 | [43]                          | Flow b from NSEC                                                       |
| 59 | 17/05/16 | 25/05/16 |           | 51,799,351 | 4,250,000 | 99,580,400  | 4,250,000 | 151,379,751 | [43]                          | Flow a from BN                                                         |
| 60 | 27/02/17 | 30/04/17 |           | 51,799,351 | 9,800,000 | 109,380,400 | 9,800,000 | 161,179,751 | [44]                          | Lava flows                                                             |
|    | 06/08/18 | 12/08/18 | 103,680   | 51,903,031 |           | 109,380,400 | 103,680   | 161,283,431 | [45]<br>(Boll. Etna 20180814) | Strombolian activity from BN+NEC                                       |
|    | 13/08/18 | 19/08/18 | 103,680   | 52,006,711 |           | 109,380,400 | 103,680   | 161,387,111 | [45]<br>(Boll. Etna 20180821) | Strombolian activity from NSEC                                         |
|    | 27/08/18 | 27/08/18 |           | 52,006,711 | 2,710,000 | 112,090,400 | 2,710,000 | 164,097,111 | [45]<br>(Boll. Etna 20180828) | Lava flow only                                                         |
|    | 04/09/18 | 04/09/18 |           | 52,006,711 | 40,000    | 112,130,400 | 40,000    | 164,137,111 | [45]<br>(Boll. Etna 20180904) | Lava flow only. Estimated considering 2 km L x 10 m W x 2 m H from map |
|    | 03/09/19 | 09/09/19 | 103,680   | 52,110,391 |           | 112,130,400 | 103,680   | 164,240,791 | [45]<br>(Boll. Etna           | Strombolian activity                                                   |

|          |          |         |            |             |         |             |                                  |                                                    |
|----------|----------|---------|------------|-------------|---------|-------------|----------------------------------|----------------------------------------------------|
|          |          |         |            |             |         |             | 20180911)                        | from<br>NSEC+BN+<br>NEC                            |
| 10/09/18 | 16/09/18 | 103,680 | 52,214,071 | 112,130,400 | 103,680 | 164,344,471 | [45]<br>(Boll. Etna<br>20180918) | Strombolian<br>activity<br>from<br>NSEC+BN+<br>NEC |
| 17/09/18 | 23/09/18 | 103,680 | 52,317,751 | 112,130,400 | 103,680 | 164,448,151 | [45]<br>(Boll. Etna<br>20180925) | Strombolian<br>activity<br>from<br>NSEC+BN+<br>NEC |
| 24/09/18 | 30/09/18 | 103,680 | 52,421,431 | 112,130,400 | 103,680 | 164,551,831 | [45]<br>(Boll. Etna<br>20181002) | Strombolian<br>activity<br>from<br>NSEC+BN+<br>NEC |
| 01/10/18 | 07/10/18 | 103,680 | 52,525,111 | 112,130,400 | 103,680 | 164,655,511 | [45]<br>(Boll. Etna<br>20181009) | Strombolian<br>activity<br>from<br>NSEC+BN+<br>NEC |
| 08/10/18 | 14/10/18 | 103,680 | 52,628,791 | 112,130,400 | 103,680 | 164,759,191 | [45]<br>(Boll. Etna<br>20181016) | Strombolian<br>activity<br>from<br>NSEC+BN+<br>NEC |
| 15/10/18 | 21/10/18 | 103,680 | 52,732,471 | 112,130,400 | 103,680 | 164,862,871 | [45]<br>(Boll. Etna<br>20181023) | Strombolian<br>activity<br>from<br>NSEC+BN+<br>NEC |
| 22/10/18 | 28/10/18 | 103,680 | 52,836,151 | 112,130,400 | 103,680 | 164,966,551 | [45]<br>(Boll. Etna              | Strombolian<br>activity                            |

|          |          |         |            |           |             |           |             |                                  |                                                    |
|----------|----------|---------|------------|-----------|-------------|-----------|-------------|----------------------------------|----------------------------------------------------|
|          |          |         |            |           |             |           |             | 20181030)                        | from<br>NSEC+BN+<br>NEC                            |
| 29/10/18 | 04/11/18 | 103,680 | 52,939,831 |           | 112,130,400 | 103,680   | 165,070,231 | [45]<br>(Boll. Etna<br>20181104) | Strombolian<br>activity<br>from<br>NSEC+BN+<br>NEC |
| 05/11/18 | 11/11/18 | 103,680 | 53,043,511 |           | 112,130,400 | 103,680   | 165,173,911 | [45]<br>(Boll. Etna<br>20181113) | Strombolian<br>activity<br>from<br>NSEC+BN+<br>NEC |
| 12/11/18 | 18/11/18 | 103,680 | 53,147,191 |           | 112,130,400 | 103,680   | 165,277,591 | [45]<br>(Boll. Etna<br>20181112) | Strombolian<br>activity<br>from<br>NSEC+BN+<br>NEC |
| 19/11/18 | 25/11/18 | 103,680 | 53,250,871 |           | 112,130,400 | 103,680   | 165,381,271 | [45]<br>(Boll. Etna<br>20181127) | Strombolian<br>activity<br>from<br>NSEC+BN+<br>NEC |
| 26/11/18 | 02/12/18 | 103,680 | 53,354,551 |           | 112,130,400 | 103,680   | 165,484,951 | [45]<br>(Boll. Etna<br>20181204) | Strombolian<br>activity<br>from<br>NSEC+BN+<br>NEC |
| 03/12/18 | 09/12/18 | 103,680 | 53,458,231 |           | 112,130,400 | 103,680   | 165,588,631 | [45]<br>(Boll. Etna<br>20181211) | Strombolian<br>activity<br>from<br>NSEC+BN+<br>NEC |
| 04/12/18 | 09/12/18 |         | 53,458,231 | 1,250,000 | 113,380,400 | 1,250,000 | 166,838,631 | [45]<br>(Boll. Etna              | Lava flow<br>estimated                             |



|    |          |          |         |            |           |             |           |             |                                     |                                                                        |
|----|----------|----------|---------|------------|-----------|-------------|-----------|-------------|-------------------------------------|------------------------------------------------------------------------|
|    |          |          |         |            |           |             |           |             | 20181211)                           | from map:<br>500 m L x<br>500 m W x 5<br>m H                           |
|    | 10/12/18 | 17/12/18 |         | 53,458,231 | 125,000   | 113,505,400 | 125,000   | 166,963,631 | [45]<br>(Boll. Etna<br>20181218)    | Lava flow<br>estimated<br>from map:<br>250 m L x<br>250 m W x 2<br>m H |
| 61 | 24/12/18 | 27/12/18 | 250,000 | 53,708,231 | 2,500,000 | 116,005,400 | 2,750,000 | 169,713,631 | [46]                                | [46]                                                                   |
|    | 21/01/19 | 27/01/19 | 103,680 | 53,811,911 |           | 116,005,400 | 103,680   | 169,817,311 | [45]<br>(Boll. Etna<br>20190129)    | Strombolian<br>activity<br>from<br>NSEC+BN+<br>NEC                     |
|    | 28/01/19 | 03/02/19 | 103,680 | 53,915,591 |           | 116,005,400 | 103,680   | 169,920,991 | [45]<br>(Boll. Etna<br>20190205)    | Strombolian<br>activity<br>from<br>NSEC+BN+<br>NEC                     |
|    | 29/04/19 | 05/05/19 | 103,680 | 54,019,271 |           | 116,005,400 | 103,680   | 170,024,671 | [45]<br>(Boll. Etna<br>20190507)    | Strombolian<br>activity<br>from<br>NSEC+BN                             |
|    | 30/05/19 | 02/06/19 |         | 54,019,271 | 4,400,000 | 120,405,400 | 4,400,000 | 174,424,671 | [45,47]<br>(Boll. Etna<br>20190604) | 2 lava flows<br>+ scoria<br>cone                                       |
|    | 18/07/19 | 21/07/19 |         | 54,019,271 | 700,000   | 121,105,400 | 700,000   | 175,124,671 | [48]                                |                                                                        |
|    | 27/07/19 | 28/07/19 |         | 54,019,271 | 1,000,000 | 122,105,400 | 1,000,000 | 176,124,671 | [48]                                |                                                                        |
|    | 29/07/19 | 04/08/19 | 103,680 | 54,122,951 |           | 122,105,400 | 103,680   | 176,228,351 | [45]<br>(Boll. Etna<br>20190806)    | Strombolian<br>activity<br>from<br>NSEC+BN                             |
|    | 19/08/19 | 25/08/19 | 103,680 | 54,226,631 |           | 122,105,400 | 103,680   | 176,332,031 | [45]                                | Strombolian                                                            |

|          |          |         |            |           |             |           |             |                               |                                      |
|----------|----------|---------|------------|-----------|-------------|-----------|-------------|-------------------------------|--------------------------------------|
|          |          |         |            |           |             |           |             | (Boll. Etna 20190827)         | activity from NEC+BN                 |
| 02/09/19 | 08/09/19 | 103,680 | 54,330,311 |           | 122,105,400 | 103,680   | 176,435,711 | [45] (Boll. Etna 20190910)    | Strombolian activity from NEC+BN+VOR |
| 09/09/19 | 15/09/19 | 103,680 | 54,433,991 |           | 122,105,400 | 103,680   | 176,539,391 | [45] (Boll. Etna 20190917)    | Strombolian activity from NEC+VOR    |
| 16/09/19 | 22/09/19 | 103,680 | 54,537,671 | 1,000,000 | 123,105,400 | 1,103,680 | 177,643,071 | [45] (Boll. Etna 20190924)    | Strombolian activity from NEC+VOR    |
| 23/9/19  | 29/09/19 | 103,680 | 54,641,351 |           | 123,105,400 | 103,680   | 177,746,751 | [33,45] (Boll. Etna 20191001) | Strombolian activity from NEC+VOR    |
| 30/09/19 | 06/10/19 | 103,680 | 54,745,031 |           | 123,105,400 | 103,680   | 177,850,431 | [45] (Boll. Etna 20191008)    | Strombolian activity from NEC+VOR+BN |
| 07/10/19 | 13/10/19 | 103,680 | 54,848,711 |           | 123,105,400 | 103,680   | 177,954,111 | [45] (Boll. Etna 20191015)    | Strombolian activity from NEC+VOR+BN |
| 14/10/19 | 20/10/19 | 103,680 | 54,952,391 |           | 123,105,400 | 103,680   | 178,057,791 | [45] (Boll. Etna 20191022)    | Strombolian activity from NEC+VOR+BN |

|          |          |         |            |             |         |             |                                  |                                                        |
|----------|----------|---------|------------|-------------|---------|-------------|----------------------------------|--------------------------------------------------------|
| 21/10/19 | 27/10/19 | 103,680 | 55,056,071 | 123,105,400 | 103,680 | 178,161,471 | [45]<br>(Boll. Etna<br>20191029) | Strombolian<br>activity<br>from<br>NEC+VOR+<br>BN      |
| 28/10/19 | 03/11/19 | 103,680 | 55,159,751 | 123,105,400 | 103,680 | 178,265,151 | [45]<br>(Boll. Etna<br>20191105) | Strombolian<br>activity<br>from<br>NEC+VOR+<br>BN      |
| 04/11/19 | 10/11/19 | 103,680 | 55,263,431 | 123,105,400 | 103,680 | 178,368,831 | [45]<br>(Boll. Etna<br>20191112) | Strombolian<br>activity<br>from<br>NEC+VOR+<br>BN+NSEC |
| 11/11/19 | 17/11/19 | 103,680 | 55,367,111 | 123,105,400 | 103,680 | 178,472,511 | [45]<br>(Boll. Etna<br>20191119) | Strombolian<br>activity<br>from<br>NEC+VOR+<br>BN      |
| 18/11/19 | 24/11/19 | 103,680 | 55,470,791 | 123,105,400 | 103,680 | 178,576,191 | [45]<br>(Boll. Etna<br>20191126) | Strombolian<br>activity<br>from<br>NEC+VOR+<br>BN+NSEC |
| 25/11/19 | 01/12/19 | 103,680 | 55,574,471 | 123,105,400 | 103,680 | 178,679,871 | [45]<br>(Boll. Etna<br>20191203) | Strombolian<br>activity<br>from<br>NEC+VOR+<br>BN+NSEC |
| 02/12/19 | 08/12/19 | 103,680 | 55,678,151 | 123,105,400 | 103,680 | 178,783,551 | [45]<br>(Boll. Etna<br>20191210) | Strombolian<br>activity<br>from<br>NEC+VOR+<br>BN+NSEC |

|          |          |         |            |           |             |           |             |                                  |                                                                                                                            |
|----------|----------|---------|------------|-----------|-------------|-----------|-------------|----------------------------------|----------------------------------------------------------------------------------------------------------------------------|
| 09/12/19 | 15/12/19 | 103,680 | 55,781,831 |           | 123,105,400 | 103,680   | 178,887,231 | [45]<br>(Boll. Etna<br>20191217) | Strombolian<br>activity<br>from<br>NEC+VOR+<br>BN+NSEC                                                                     |
| 16/12/19 | 22/12/19 | 103,680 | 55,885,511 |           | 123,105,400 | 103,680   | 178,990,911 | [45]<br>(Boll. Etna<br>20191224) | Strombolian<br>activity<br>from<br>NEC+VOR+<br>BN+NSEC                                                                     |
| 23/12/19 | 30/12/19 | 103,680 | 55,989,191 |           | 123,105,400 | 103,680   | 179,094,591 | [45]<br>(Boll. Etna<br>20191231) | Strombolian<br>activity<br>from<br>NEC+VOR+<br>BN+NSEC                                                                     |
| 01/10/19 | 17/04/20 |         | 55,989,191 | 3,628,800 | 126,734,200 | 3,628,800 | 182,723,391 | [45]<br>(Boll. Etna<br>20200414) | Lava flow<br>volume<br>estimated<br>from 0,2<br>m³/s<br>obtained<br>from [24]<br>for 7<br>months<br>eruption<br>within VOR |
| 10/08/20 | 16/08/20 | 103,680 | 56,092,871 |           | 126,734,200 | 103,680   | 182,827,071 | [45]<br>(Boll. Etna<br>20200818) | Strombolian<br>activity<br>from<br>NEC+VOR+<br>NSEC                                                                        |
| 17/08/20 | 23/08/20 | 103,680 | 56,196,551 |           | 126,734,200 | 103,680   | 182,930,751 | [45]<br>(Boll. Etna<br>20200825) | Strombolian<br>activity<br>from<br>NEC+VOR+                                                                                |

|          |          |         |            |             |         |             |                                  |                                                        |
|----------|----------|---------|------------|-------------|---------|-------------|----------------------------------|--------------------------------------------------------|
|          |          |         |            |             |         |             |                                  | BN+NSEC                                                |
| 24/08/20 | 30/08/20 | 103,680 | 56,300,231 | 126,734,200 | 103,680 | 183,034,431 | [45]<br>(Boll. Etna<br>20200901) | Strombolian<br>activity<br>from<br>NEC+VOR+<br>BN+NSEC |
| 31/08/20 | 06/09/20 | 103,680 | 56,403,911 | 126,734,200 | 103,680 | 183,138,111 | [45]<br>(Boll. Etna<br>20200908) | Strombolian<br>activity<br>from<br>NEC+VOR+<br>BN+NSEC |
| 17/08/20 | 23/08/20 | 103,680 | 56,507,591 | 126,734,200 | 103,680 | 183,241,791 | [45]<br>(Boll. Etna<br>20200825) | Strombolian<br>activity<br>from<br>NEC+VOR+<br>BN+NSEC |
| 31/08/20 | 06/09/20 | 103,680 | 56,611,271 | 126,734,200 | 103,680 | 183,345,471 | [45]<br>(Boll. Etna<br>20200908) | Strombolian<br>activity<br>from<br>NEC+VOR+<br>BN+NSEC |
| 07/09/20 | 13/09/20 | 103,680 | 56,714,951 | 126,734,200 | 103,680 | 183,449,151 | [45]<br>(Boll. Etna<br>20200915) | Strombolian<br>activity<br>from<br>NEC+VOR+<br>BN+NSEC |
| 14/09/20 | 20/09/20 | 103,680 | 56,818,631 | 126,734,200 | 103,680 | 183,552,831 | [45]<br>(Boll. Etna<br>20200922) | Strombolian<br>activity<br>from<br>NEC+VOR+<br>BN+NSEC |
| 21/09/20 | 27/09/20 | 103,680 | 56,922,311 | 126,734,200 | 103,680 | 183,656,511 | [45]<br>(Boll. Etna<br>20200929) | Strombolian<br>activity<br>from<br>NEC+VOR+            |

|          |          |         |            |             |         |             |                                  |                                                        |
|----------|----------|---------|------------|-------------|---------|-------------|----------------------------------|--------------------------------------------------------|
|          |          |         |            |             |         |             |                                  | BN+NSEC                                                |
| 28/09/20 | 04/10/20 | 103,680 | 57,025,991 | 126,734,200 | 103,680 | 183,760,191 | [45]<br>(Boll. Etna<br>20201006) | Strombolian<br>activity<br>from<br>NEC+VOR+<br>BN+NSEC |
| 05/10/20 | 11/10/20 | 103,680 | 57,129,671 | 126,734,200 | 103,680 | 183,863,871 | [45]<br>(Boll. Etna<br>20201013) | Strombolian<br>activity<br>from<br>NEC+VOR+<br>BN+NSEC |
| 12/10/20 | 18/10/20 | 103,680 | 57,233,351 | 126,734,200 | 103,680 | 183,967,551 | [45]<br>(Boll. Etna<br>20201020) | Strombolian<br>activity<br>from<br>NEC+VOR+<br>BN+NSEC |
| 19/10/20 | 25/10/20 | 103,680 | 57,337,031 | 126,734,200 | 103,680 | 184,071,231 | [45]<br>(Boll. Etna<br>20201027) | Strombolian<br>activity<br>from<br>NEC+VOR+<br>BN+NSEC |
| 26/10/20 | 01/11/20 | 103,680 | 57,440,711 | 126,734,200 | 103,680 | 184,174,911 | [45]<br>(Boll. Etna<br>20201103) | Strombolian<br>activity<br>from<br>NEC+VOR+<br>BN+NSEC |
| 02/11/20 | 08/11/20 | 103,680 | 57,544,391 | 126,734,200 | 103,680 | 184,278,591 | [45]<br>(Boll. Etna<br>20201110) | Strombolian<br>activity<br>from<br>NEC+VOR+<br>BN+NSEC |
| 09/11/20 | 15/11/20 | 103,680 | 57,648,071 | 126,734,200 | 103,680 | 184,382,271 | [45]<br>(Boll. Etna<br>20201117) | Strombolian<br>activity<br>from<br>NEC+VOR+            |

|    |          |          |         |            |           |             |           |             |      |                  |                                                                      |
|----|----------|----------|---------|------------|-----------|-------------|-----------|-------------|------|------------------|----------------------------------------------------------------------|
|    |          |          |         |            |           |             |           |             |      |                  | BN+NSEC                                                              |
|    |          |          |         |            |           |             |           |             |      |                  | Strombolian activity from [45] (Boll. Etna 20201124) NEC+VOR+BN+NSEC |
|    | 16/11/20 | 22/11/20 | 103,680 | 57,751,751 |           | 126,734,200 | 103,680   | 184,485,951 |      |                  |                                                                      |
|    |          |          |         |            |           |             |           |             |      |                  | Strombolian activity from [45] (Boll. Etna 20201131) NEC+VOR+BN+NSEC |
|    | 23/11/20 | 29/11/20 | 103,680 | 57,855,431 |           | 126,734,200 | 103,680   | 184,589,631 |      |                  |                                                                      |
|    |          |          |         |            |           |             |           |             |      |                  | Strombolian activity from [45] (Boll. Etna 20201208) NEC+VOR+BN+NSEC |
|    | 30/11/20 | 06/12/20 | 103,680 | 57,959,111 |           | 126,734,200 | 103,680   | 184,693,311 |      |                  |                                                                      |
|    |          |          |         |            |           |             |           |             |      |                  | Strombolian activity from [45] (Boll. Etna 20201215) NEC+VOR+BN+NSEC |
|    | 07/12/20 | 13/12/20 | 103,680 | 58,062,791 |           | 126,734,200 | 103,680   | 184,796,991 |      |                  |                                                                      |
| 62 | 13/12/20 | 13/12/20 | 240,925 | 58,303,716 |           | 126,734,200 | 240,925   | 185,037,916 | [23] |                  | No lava flow                                                         |
| 63 | 14/12/20 | 14/12/20 | 200,000 | 58,503,716 | 790,000   | 127,524,200 | 990,000   | 186,027,916 | [23] | [49]             | Sum of 2 events                                                      |
| 64 | 21/12/20 | 21/12/20 | 577,322 | 59,081,038 | 790,000   | 128,314,200 | 1,367,322 | 187,395,238 | [23] | estimated        |                                                                      |
| 65 | 22/12/20 | 22/12/20 | 715,258 | 59,796,296 | 1,740,000 | 130,054,200 | 2,455,258 | 189,850,496 | [23] | [50]             | Lava flow from area from [50] considering 2 m average thickness      |
| 66 | 18/01/21 | 18/01/21 | 515,490 | 60,311,787 | 1,180,000 | 131,234,200 | 1,695,490 | 191,545,987 | [23] | [51]             |                                                                      |
| 67 | 16/02/21 | 16/02/21 | 457,998 | 60,769,785 | 2,600,000 | 133,834,200 | 3,057,998 | 194,603,985 | [23] | [45] (Boll. Etna |                                                                      |

|    |          |          |           |            |           |             |           |             |      |                                                                                                       |
|----|----------|----------|-----------|------------|-----------|-------------|-----------|-------------|------|-------------------------------------------------------------------------------------------------------|
|    |          |          |           |            |           |             |           |             |      | 20210223)                                                                                             |
| 68 | 18/02/21 | 18/02/21 | 816,429   | 61,586,213 | 4,000,000 | 137,834,200 | 4,816,429 | 199,420,413 | [23] | [45]<br>(Boll. Etna<br>20210223)                                                                      |
| 69 | 19/02/21 | 19/02/21 | 778,880   | 62,365,093 | 4,000,000 | 141,834,200 | 4,778,880 | 204,199,293 | [23] | [45]<br>(Boll. Etna<br>20210223)                                                                      |
| 70 | 21/02/21 | 21/02/21 | 1,426,209 | 63,791,302 | 2,900,000 | 144,734,200 | 4,326,209 | 208,525,502 | [23] | [45]<br>(Boll. Etna<br>20210223)                                                                      |
| 71 | 23/02/21 | 23/02/21 | 1,511,790 | 65,303,092 | 3,260,000 | 147,994,200 | 4,771,790 | 213,297,292 | [23] | [50]<br>Sum of 2<br>events. Lava<br>flow from<br>area [50]<br>considering<br>2 m average<br>thickness |
| 72 | 24/02/21 | 24/02/21 | 1,371,599 | 66,674,690 | 2,600,000 | 150,594,200 | 3,971,599 | 217,268,890 | [23] | [45]<br>(Boll. Etna<br>20210302)                                                                      |
| 73 | 28/02/21 | 28/02/21 | 700,091   | 67,374,781 | 1,660,000 | 152,254,200 | 2,360,091 | 219,628,981 | [23] | [50]<br>Lava flow<br>from area<br>[50]<br>considering<br>2 m average<br>thickness                     |
| 74 | 02/03/21 | 02/03/21 | 1,026,419 | 68,401,200 | 2,460,000 | 154,714,200 | 3,486,419 | 223,115,400 | [23] | [50]<br>Lava flow<br>from area<br>from [50]<br>considering<br>2 m average<br>thickness                |
| 75 | 04/03/21 | 04/03/21 | 2,325,000 | 70,726,200 | 1,577,184 | 156,291,384 | 3,902,184 | 227,017,584 | [23] | [45]<br>(Boll. Etna<br>20210309)<br>Sum of 2<br>events                                                |



|    |          |          |           |            |           |             |           |             |      |                                                                                        |
|----|----------|----------|-----------|------------|-----------|-------------|-----------|-------------|------|----------------------------------------------------------------------------------------|
| 76 | 07/03/21 | 07/03/21 | 1,067,224 | 71,793,424 | 900,000   | 157,191,384 | 1,967,224 | 228,984,808 | [23] | [45]<br>(Boll. Etna<br>20210309)                                                       |
| 77 | 10/03/21 | 10/03/21 | 1,440,965 | 73,234,389 | 1,160,000 | 158,351,384 | 2,600,965 | 231,585,773 | [23] | [50]<br>Lava flow<br>from area<br>from [50]<br>considering<br>2 m average<br>thickness |
| 78 | 12/03/21 | 12/03/21 | 1,632,296 | 74,866,685 | 2,400,000 | 160,751,384 | 4,032,296 | 235,618,069 | [23] | [52]                                                                                   |
| 79 | 15/03/21 | 15/03/21 | 527,531   | 75,394,216 | 1,100,000 | 161,851,384 | 1,627,531 | 237,245,600 | [23] | [45]<br>(Boll. Etna<br>20210323)                                                       |
| 80 | 17/03/21 | 17/03/21 | 1,583,025 | 76,977,241 | 900,000   | 162,751,384 | 2,483,025 | 239,728,625 | [23] | [45]<br>(Boll. Etna<br>20210323)                                                       |
| 81 | 19/03/21 | 19/03/21 | 747,409   | 77,724,650 | 500,000   | 163,251,384 | 1,247,409 | 240,976,034 | [23] | [45]<br>(Boll. Etna<br>20210323)                                                       |
| 82 | 24/03/21 | 24/03/21 | 4,556,147 | 82,280,798 | 1,600,000 | 164,851,384 | 6,156,147 | 247,132,182 | [23] | [45]<br>(Boll. Etna<br>20210330)                                                       |
| 83 | 01/04/21 | 01/04/21 | 4,102,594 | 86,383,392 | 1,400,000 | 166,251,384 | 5,502,594 | 252,634,776 | [23] | [45]<br>(Boll. Etna<br>20210406)                                                       |
| 84 | 19/05/21 | 19/05/21 | 1,594,034 | 87,977,425 | 450,000   | 166,701,384 | 2,044,034 | 254,678,809 | [23] | [45]<br>(Boll. Etna<br>20210525)                                                       |
| 85 | 21/05/21 | 21/05/21 | 988,570   | 88,965,995 | 150,000   | 166,851,384 | 1,138,570 | 255,817,379 | [23] | [45]<br>(Boll. Etna<br>20210525)                                                       |
| 86 | 22/05/21 | 22/05/21 | 864,963   | 89,830,958 | 70,000    | 166,921,384 | 934,963   | 256,752,342 | [23] | [45]<br>(Boll. Etna<br>20210525)                                                       |
| 87 | 24/05/21 | 24/05/21 | 815,946   | 90,646,904 | 150,000   | 167,071,384 | 965,946   | 257,718,288 | [23] | [45]                                                                                   |

|    |          |          |           |            |           |             |           |             |      |                                  |                                                                                                      |
|----|----------|----------|-----------|------------|-----------|-------------|-----------|-------------|------|----------------------------------|------------------------------------------------------------------------------------------------------|
|    |          |          |           |            |           |             |           |             |      | (Boll. Etna<br>20210601)         |                                                                                                      |
| 88 | 25/05/21 | 25/05/21 | 202,015   | 90,848,920 | 460,000   | 167,531,384 | 662,015   | 258,380,304 | [23] | [50]                             | Lava flow<br>from area<br>from [50]<br>considering<br>2 m average<br>thickness                       |
| 89 | 26/05/21 | 26/05/21 | 409,362   | 91,258,282 | 400,000   | 167,931,384 | 809,362   | 259,189,666 | [23] | [50]                             | Lava flow<br>from area<br>from [50]<br>considering<br>2 m average<br>thickness                       |
| 90 | 28/05/21 | 28/05/21 | 947,638   | 92,205,920 | 400,000   | 168,331,384 | 1,347,638 | 260,537,304 | [23] | [50]                             | Sum of 3<br>events<br>Lava flow<br>from area<br>from [50]<br>considering<br>2 m average<br>thickness |
| 91 | 30/05/21 | 30/05/21 | 688,428   | 92,894,348 | 150,000   | 168,481,384 | 838,428   | 261,375,732 | [23] | [45]<br>(Boll. Etna<br>20210608) |                                                                                                      |
| 92 | 02/06/21 | 02/06/21 | 1,384,213 | 94,278,561 | 1,200,000 | 169,681,384 | 2,584,213 | 263,959,945 | [23] | [50]                             | Lava flow<br>from area<br>from [50]<br>considering<br>2 m average<br>thickness                       |
| 93 | 04/06/21 | 04/06/21 | 756,334   | 95,034,895 | 300,000   | 169,981,384 | 1,056,334 | 265,016,279 | [23] | [45]<br>(Boll. Etna<br>20210615) |                                                                                                      |
| 94 | 12/06/21 | 12/06/21 | 731,056   | 95,765,951 | 700,000   | 170,681,384 | 1,431,056 | 266,447,335 | [23] | [45]                             |                                                                                                      |

|     |          |          |         |             |           |             |           |             |      |                                  |                    |
|-----|----------|----------|---------|-------------|-----------|-------------|-----------|-------------|------|----------------------------------|--------------------|
|     |          |          |         |             |           |             |           |             |      | (Boll. Etna<br>20210615)         |                    |
| 95  | 14/06/21 | 14/06/21 | 444,714 | 96,210,666  | 300,000   | 170,981,384 | 744,714   | 267,192,050 | [23] | [45]<br>(Boll. Etna<br>20210622) |                    |
| 96  | 16/06/21 | 16/06/21 | 518,779 | 96,729,444  | 300,000   | 171,281,384 | 818,779   | 268,010,828 | [23] | [45]<br>(Boll. Etna<br>20210622) |                    |
| 97  | 17/06/21 | 17/06/21 | 497,484 | 97,226,928  | 300,000   | 171,581,384 | 797,484   | 268,808,312 | [23] | [45]<br>(Boll. Etna<br>20210622) |                    |
| 98  | 19/06/21 | 19/06/21 | 378,197 | 97,605,125  | 300,000   | 171,881,384 | 678,197   | 269,486,509 | [23] | estimated                        |                    |
| 99  | 20/06/21 | 20/06/21 | 631,589 | 98,236,714  | 300,000   | 172,181,384 | 931,589   | 270,418,098 | [23] | estimated                        |                    |
| 100 | 22/06/21 | 22/06/21 | 713,118 | 98,949,832  | 400,000   | 172,581,384 | 1,113,118 | 271,531,216 | [23] | [45]<br>(Boll. Etna<br>20210629) |                    |
| 101 | 23/06/21 | 23/06/21 | 988,279 | 99,938,111  | 1,100,000 | 173,681,384 | 2,088,279 | 273,619,495 | [23] | [45]<br>(Boll. Etna<br>20210629) |                    |
|     | 24/06/21 | 24/06/21 | 387,095 | 100,325,206 | 800,000   | 174,481,384 | 1,187,095 | 274,806,590 | [23] | [45]<br>(Boll. Etna<br>20210629) |                    |
| 102 | 25/06/21 | 25/06/21 | 998,699 | 101,323,905 | 500,000   | 174,981,384 | 1,498,699 | 276,305,289 | [23] | [45]<br>(Boll. Etna<br>20210629) | Sum of 2<br>events |
| 103 | 26/06/21 | 26/06/21 | 353,256 | 101,677,160 | 200,000   | 175,181,384 | 553,256   | 276,858,544 | [23] | [45]<br>(Boll. Etna<br>20210629) |                    |
| 104 | 27/06/21 | 27/06/21 | 428,751 | 102,105,912 | 500,000   | 175,681,384 | 928,751   | 277,787,296 | [23] | [45]<br>(Boll. Etna<br>20210629) |                    |
| 105 | 28/06/21 | 28/06/21 | 754,160 | 102,860,072 | 900,000   | 176,581,384 | 1,654,160 | 279,441,456 | [23] | [45]<br>(Boll. Etna<br>20210706) |                    |
| 106 | 02/07/21 | 02/07/21 | 905,014 | 103,765,086 | 400,000   | 176,981,384 | 1,305,014 | 280,746,470 | [23] | [45]                             |                    |

|     |          |          |           |             |           |             |           |             |      |                                  |                 |
|-----|----------|----------|-----------|-------------|-----------|-------------|-----------|-------------|------|----------------------------------|-----------------|
|     |          |          |           |             |           |             |           |             |      | (Boll. Etna<br>20210706)         |                 |
| 107 | 04/07/21 | 04/07/21 | 935,118   | 104,700,203 | 900,000   | 177,881,384 | 1,835,118 | 282,581,587 | [23] | [45]<br>(Boll. Etna<br>20210713) |                 |
| 108 | 06/07/21 | 06/07/21 | 1,197,609 | 105,897,813 | 400,000   | 178,281,384 | 1,597,609 | 284,179,197 | [23] | [45]<br>(Boll. Etna<br>20210713) |                 |
| 109 | 08/07/21 | 08/07/21 | 1,116,382 | 107,014,194 | 700,000   | 178,981,384 | 1,816,382 | 285,995,578 | [23] | [45]<br>(Boll. Etna<br>20210713) |                 |
| 110 | 14/07/21 | 14/07/21 | 1,154,181 | 108,168,375 | 700,000   | 179,681,384 | 1,854,181 | 287,849,759 | [23] | [45]<br>(Boll. Etna<br>20210720) |                 |
| 111 | 20/07/21 | 20/07/21 | 2,257,727 | 110,426,102 | 600,000   | 180,281,384 | 2,857,727 | 290,707,486 | [23] | [45]<br>(Boll. Etna<br>20210727) |                 |
| 112 | 31/07/21 | 31/07/21 | 2,829,150 | 113,255,252 | 800,000   | 181,081,384 | 3,629,150 | 294,336,636 | [23] | [45]<br>(Boll. Etna<br>20210803) |                 |
| 113 | 09/08/21 | 09/08/21 | 1,479,984 | 114,735,237 | 1,400,000 | 182,481,384 | 2,879,984 | 297,216,621 | [23] | [41]                             |                 |
| 114 | 29/08/21 | 29/08/21 | 1,102,711 | 115,837,947 | 900,000   | 183,381,384 | 2,002,711 | 299,219,331 | [23] | [45]<br>(Boll. Etna<br>20210831) |                 |
| 115 | 21/09/21 | 21/09/21 | 882,445   | 116,720,392 | 700,000   | 184,081,384 | 1,582,445 | 300,801,776 | [23] | [45]<br>(Boll. Etna<br>20211005) |                 |
| 116 | 23/10/21 | 23/10/21 | 1,631,005 | 118,351,397 | 500,000   | 184,581,384 | 2,131,005 | 302,932,781 | [23] | [45]<br>(Boll. Etna<br>20211026) |                 |
| 117 | 10/02/22 | 10/02/22 | 2,875,776 | 121,227,173 | 900,000   | 185,481,384 | 3,775,776 | 306,708,557 | [23] | [45]<br>(Boll. Etna<br>20220215) |                 |
| 118 | 21/02/22 | 21/02/22 | 1,392,193 | 122,619,366 | 800,000   | 186,281,384 | 2,192,193 | 308,900,750 | [23] | [45]<br>(Boll. Etna              | 2 Lava<br>flows |

|     |          |          |             |           |             |           |             |                                                                     |                 |
|-----|----------|----------|-------------|-----------|-------------|-----------|-------------|---------------------------------------------------------------------|-----------------|
|     |          |          |             |           |             |           |             | 20220301)                                                           |                 |
| 119 | 20/05/22 | 20/05/22 | 122,619,366 | 1,500,000 | 187,781,384 | 1,500,000 | 310,400,750 | [45]<br>(Boll. Etna<br>20220524)                                    | 2 Lava<br>flows |
| 120 | 29/05/22 | 29/05/22 | 122,619,366 | 2,500,000 | 190,281,384 | 2,500,000 | 312,900,750 | [45]<br>(Boll. Etna continuousl<br>20220531) y fed, added<br>volume | 2 Lava<br>flows |
| 121 | 05/06/22 | 05/06/22 | 122,619,366 | 1,500,000 | 191,781,384 | 1,500,000 | 314,400,750 | [45]<br>(Boll. Etna continuousl<br>20220607) y fed, added<br>volume | 2 Lava<br>flows |
| 122 | 12/06/22 | 12/06/22 | 122,619,366 | 2,700,000 | 194,481,384 | 2,700,000 | 317,100,750 | [45]<br>(Boll. Etna continuousl<br>20220614) y fed, added<br>volume | 2 Lava<br>flows |

BN = Bocca Nuova crater; NEC = NE Crater; VOR = Voragine crater; NSEC = New SE Crater. The volume erupted by the Strombolian activity is estimated considering  $0.2 \text{ m}^3 \text{ s}^{-1}$  obtained by [24] extended over the period of activity.
